# Supplementary material for: The Impact of the COVID-19 Pandemic on Youth with Chronic Pain and Their Parents: A Longitudinal Examination of Who Are Most at Risk
Source: MDPI journal article supplement (doi:10.3390/children9050745), 2022-05-19
Supplement: s1 [file s1]

**Table S1.** COVID Impact Questionnaire Means and Standard Deviations.

| Likert Scale Questions                                                                                                                                            |             |                                                                                                                            |             |
|-------------------------------------------------------------------------------------------------------------------------------------------------------------------|-------------|----------------------------------------------------------------------------------------------------------------------------|-------------|
| Parent Questionnaire                                                                                                                                              |             | Child Questionnaire                                                                                                        |             |
| Item                                                                                                                                                              | Mean (SD)   | Item                                                                                                                       | Mean (SD)   |
| 1. Did you or your family experience financial hardships?                                                                                                         | 1.75 (1.05) | 1. Did you or your family experience financial (money) hardships?                                                          | 1.73 (0.92) |
| 2. Did you fear for your own or your family's health or safety?                                                                                                   | 2.27 (1.01) | 2. Did you fear for your own or your family's health or safety?                                                            | 2.26 (1.08) |
| 3. Did your children fear for their own or your family's health or safety?                                                                                        | 2.21 (1.02) | 3. Did your parents fear for their own or your family's health or safety?                                                  | 2.33 (1.04) |
| 4. To what extent was your life disrupted by the COVID-19 pandemic?                                                                                               | 3.37 (1.15) | 4. To what extent was your life disrupted by the COVID pandemic?                                                           | 3.65 (1.04) |
| 5. Did you have difficulty getting food or water?                                                                                                                 | 1.21 (0.57) | 5. Did you or your family have difficulty getting food or water?                                                           | 1.06 (0.29) |
| 6. Did you or your family experience a shortage of essential goods (e.g., toilet paper, cleaning supplies)?                                                       | 1.50 (0.86) | 6. Did you or your family experience a shortage of essential goods (e.g., toilet paper, cleaning supplies)?                | 1.31 (0.60) |
| 7. Did you or your family have difficulty getting medicine?                                                                                                       | 1.23 (0.60) | 7. Did you or your family have difficulty getting medicine?                                                                | 1.21 (0.65) |
| 8. Did you or your family have difficulty getting health care when you/they needed it?                                                                            | 1.64 (0.91) | 8. Did you or your family have difficulty getting health care when you/they needed it?                                     | 1.36 (0.76) |
| 9. Did you or your family have difficulty getting mental health care when you/they needed it?                                                                     | 1.53 (0.88) | 9. Did you or your family have difficulty getting mental health care when you/they needed it?                              | 1.64 (1.08) |
| 10. Did your children fight, argue, or complain more than usual (if your child doesn't have a sibling please select 'not at all')?                                | 1.88 (1.08) | 10. Did you and your siblings fight, argue, or complain more than usual (if you don't have a sibling select 'not at all')? | 2.19 (1.10) |
| 11. Did you and your partner/spouse fight or argue more than usual or experience more conflict? (if you don't have a partner/spouse, please select "not at all"). | 1.62 (0.97) | 11. Did your parents fight or argue more than usual or experience more conflict?                                           | 1.68 (1.02) |
| Likert Scale Questions (continued)                                                                                                                                |             |                                                                                                                            |             |
| Parent Questionnaire                                                                                                                                              |             | Child Questionnaire                                                                                                        |             |
| Item                                                                                                                                                              | Mean (SD)   | Item                                                                                                                       | Mean (SD)   |
| 12. Did you and/or your partner/spouse fight or argue more than usual with your children or experience more conflict with them?                                   | 1.79 (1.02) | 12. Did you and your parents fight or argue more than usual or experience more conflict?                                   | 1.90 (1.00) |
| 13. Have you or your family felt "cramped", or closed in, due to the physical distancing or quarantine?                                                           | 2.37 (1.09) | 13. Have you or your family felt "cramped", or closed in, due to the physical distancing or quarantine?                    | 2.42 (1.05) |
| 14. Were you less able to see or interact with your friends?                                                                                                      | 3.59 (1.15) | 14. Were you less able to see or interact with your friends?                                                               | 3.69 (1.22) |
| 15. Were you less physically active?                                                                                                                              | 2.69 (1.28) | 15. Were you less able to see your boyfriend or girlfriend? (if you don't                                                  | 1.58 (1.19) |

|                                                                                                                                                                                                                                                                                                                                                                                                                                        |             |                                                                                                                                                                  |             |
|----------------------------------------------------------------------------------------------------------------------------------------------------------------------------------------------------------------------------------------------------------------------------------------------------------------------------------------------------------------------------------------------------------------------------------------|-------------|------------------------------------------------------------------------------------------------------------------------------------------------------------------|-------------|
|                                                                                                                                                                                                                                                                                                                                                                                                                                        |             | have a boyfriend or girlfriend, please select “not at all”).                                                                                                     |             |
| 16. Did you have difficulties associated with finding childcare?                                                                                                                                                                                                                                                                                                                                                                       | 1.32 (0.88) | 16. Were you less physically active?                                                                                                                             | 2.87 (1.40) |
| 17. Did you use substances (e.g., alcohol, cannabis, or other substances) more than usual (i.e., more than the amounts you consumed before the COVID-19 pandemic)?                                                                                                                                                                                                                                                                     | 1.49 (0.72) | 17. Did you have to stop your hobbies or interests?                                                                                                              | 2.27 (1.22) |
| 18. On average, how much time did you spend each day reading/watching COVID-19 media (news, articles, social media)?                                                                                                                                                                                                                                                                                                                   | 2.67 (1.08) | 18. Did you use substances (e.g. alcohol, cannabis, or other substances) more than usual (i.e. more than the amounts you consumed before the COVID-19 pandemic)? | 1.35 (0.86) |
| 19. Were you in mandated quarantine or self-isolation (i.e., as forced by public health authorities for a specified period of time: staying within the home, no physical contact with individuals who live outside the household, maintaining 2 meters/6 feet of distance between you and people who do not live in your household).” If you were not mandated by public health to quarantine or self-isolate, please select “0 days”. | 1.36 (0.91) | 19. On average, how much time did you spend each day reading/watching COVID-19 media (news, articles, social media)?                                             | 1.92 (1.06) |

Likert Scale Questions (continued)

| Parent Questionnaire                                                                                                                                                                                                                                                     |             | Child Questionnaire                                                                                                                                                                                                                                                                                                                                                                                                                   |             |
|--------------------------------------------------------------------------------------------------------------------------------------------------------------------------------------------------------------------------------------------------------------------------|-------------|---------------------------------------------------------------------------------------------------------------------------------------------------------------------------------------------------------------------------------------------------------------------------------------------------------------------------------------------------------------------------------------------------------------------------------------|-------------|
| Item                                                                                                                                                                                                                                                                     | Mean (SD)   | Item                                                                                                                                                                                                                                                                                                                                                                                                                                  | Mean (SD)   |
| 20. Did you practice “physical distancing”? (i.e., staying within the home, no physical contact with individuals who live outside the household, maintaining 2 meters/6 feet of distance between you and people who do not live in your household). If so, for how long? | 4.04 (1.25) | 20. Were you in mandated quarantine or self-isolation (i.e., as forced by public health authorities for a specified period of time: staying within the home, no physical contact with individuals who live outside the household, maintaining 2 meters/6 feet of distance between you and people who do not live in your household). If you were not mandated by public health to quarantine or self-isolate, please select “0 days”. | 1.72 (1.34) |
|                                                                                                                                                                                                                                                                          |             | 21. Did you practice “physical distancing”? (i.e., staying within the home, no physical contact with individuals who live outside the household, maintaining 2 meters/6 feet of distance between you and people who do not live in your household). If so, for how long?                                                                                                                                                              | 3.89 (1.41) |

Frequency Questions

| Parent Questionnaire                                                                                                                                                                     |                                  | Child Questionnaire                                                             |                                   |
|------------------------------------------------------------------------------------------------------------------------------------------------------------------------------------------|----------------------------------|---------------------------------------------------------------------------------|-----------------------------------|
| Item                                                                                                                                                                                     | Yes/No (%)                       | Item                                                                            | Yes/No (%)                        |
| 21. Because of the COVID-19 pandemic, were you or your partner/spouse (or in the case of divorce/separation, your children’s other parent) ever required to be physically separated from | Yes = 8 (10.3)<br>No = 70 (89.7) | 22. Did one of your parents lose their job, whether temporarily or permanently? | Yes = 17 (23.6)<br>No = 55 (76.4) |

---

your children?

---

Frequency Questions (continued)

| Parent Questionnaire                                                                                                                                                                                                                                    |                                                | Child Questionnaire                                                                                                                          |                                                |
|---------------------------------------------------------------------------------------------------------------------------------------------------------------------------------------------------------------------------------------------------------|------------------------------------------------|----------------------------------------------------------------------------------------------------------------------------------------------|------------------------------------------------|
| Item                                                                                                                                                                                                                                                    | Yes/No (%)                                     | Item                                                                                                                                         | Yes/No (%)                                     |
| 22. Did you or your partner/spouse have to apply for government financial aid?                                                                                                                                                                          | Yes = 28 (35.9)<br>No = 50 (64.1)              | 23. Did you lose your job, whether temporarily or permanently?                                                                               | Yes = 13 (18.1)<br>No = 59 (81.9)              |
| 23. Did you or your partner/spouse have to apply for employment insurance (e.g., EI)?                                                                                                                                                                   | Yes = 16 (20.8)<br>No = 61 (79.2)              | 24. During the COVID pandemic, was anyone in your household required to leave your house to do their job?                                    | Yes = 47 (65.3)<br>No = 25 (34.7)              |
| 24. Did you or your partner/spouse lose your job, whether temporarily or permanently?                                                                                                                                                                   | Yes = 27 (34.6)<br>No = 51 (65.4)              | 25. Is your parent a front-line health care worker or do they work in a healthcare setting where patients with COVID are/were being treated? | Yes = 9 (12.5)<br>No = 63 (87.5)               |
| 25. During the COVID pandemic, were you required to leave your house to do your job?                                                                                                                                                                    | Yes = 35 (44.9)<br>No = 43 (55.1)              |                                                                                                                                              |                                                |
| 26. Are you or your partner/spouse (or in the case of divorce/separation, your children's other parent) a front-line health care worker or do you or your partner/spouse work in a healthcare setting where patients with COVID are/were being treated? | Yes = 16 (20.5)<br>No = 62 (79.5)              |                                                                                                                                              |                                                |
| Other Frequency Questions                                                                                                                                                                                                                               |                                                |                                                                                                                                              |                                                |
| Parent Questionnaire                                                                                                                                                                                                                                    |                                                | Child Questionnaire                                                                                                                          |                                                |
| Item                                                                                                                                                                                                                                                    | Label                                          | Item                                                                                                                                         | Label                                          |
|                                                                                                                                                                                                                                                         | Adequate space = 61 (78.2)                     |                                                                                                                                              | Adequate space = 55 (76.4)                     |
| 27. During the COVID pandemic, which best describes your living situation?                                                                                                                                                                              | Limited space = 12 (15.4)<br>Cramped = 5 (6.4) | 26. During the COVID pandemic, which best describes your living situation?                                                                   | Limited space = 14 (19.4)<br>Cramped = 3 (4.2) |

Abbreviation: SD, standard deviation.
